# Supplementary material for: Plasma Kynurenine to Tryptophan Ratio Is Negatively Associated with Linear Growth of Children Living in a Slum of Bangladesh: Results from a Community-Based Intervention Study
Source: PubMed Central journal article supplement (PMC7866305; doi:10.4269/ajtmh.20-0049), 2020-11-23
Supplement: tpmd200049.SD1.pdf [file tpmd200049.SD1.pdf]

**Supplemental Table S1: Spearman rank correlation between different indicators at baseline**

|              | TRP     | KYN     | KT ratio | AAT    | Calprotectin | MPO    | NEO    | Reg1B  | AGP     | CRP     | Ferritin | zinc |
|--------------|---------|---------|----------|--------|--------------|--------|--------|--------|---------|---------|----------|------|
| TRP          | 1       |         |          |        |              |        |        |        |         |         |          |      |
| KYN          | 0.276*  | 1       |          |        |              |        |        |        |         |         |          |      |
| KT ratio     | -0.354* | 0.755*  | 1        |        |              |        |        |        |         |         |          |      |
| AAT          | 0.034   | -0.114* | -0.133*  | 1      |              |        |        |        |         |         |          |      |
| Calprotectin | -0.058  | -0.150* | -0.126*  | 0.274* | 1            |        |        |        |         |         |          |      |
| MPO          | 0.009   | -0.014  | -0.028   | 0.353* | 0.371*       | 1      |        |        |         |         |          |      |
| NEO          | -0.115* | 0.165*  | 0.225*   | 0.214* | 0.048        | 0.019  | 1      |        |         |         |          |      |
| Reg1B        | 0.149*  | -0.057  | -0.164*  | 0.042  | 0.091*       | 0.266* | -0.050 | 1      |         |         |          |      |
| AGP          | -0.162* | -0.014  | 0.055    | 0.036  | 0.147*       | 0.159* | -0.016 | 0.005  | 1       |         |          |      |
| CRP          | -0.226* | 0.005   | 0.169*   | 0.039  | 0.099*       | 0.168* | 0.018  | -0.003 | 0.431*  | 1       |          |      |
| Ferritin     | -0.117* | 0.036   | 0.115*   | -0.084 | -0.111*      | -0.088 | 0.044  | -0.081 | 0.115*  | 0.181*  | 1        |      |
| zinc         | 0.122*  | -0.013  | -0.095*  | 0.071  | 0.036        | 0.063  | -0.004 | 0.046  | -0.091* | -0.182* | -0.060   | 1    |

\* Sign shows the statistical significance  $P < 0.05$

**Supplemental Table S2: Spearman rank correlation between different indicators at endline**

|              | TRP     | KYN     | KT ratio | AAT     | Calprotectin | MPO     | NEO    | Reg1B  | AGP     | CRP     | Ferritin | zinc |
|--------------|---------|---------|----------|---------|--------------|---------|--------|--------|---------|---------|----------|------|
| TRP          | 1       |         |          |         |              |         |        |        |         |         |          |      |
| KYN          | 0.397*  | 1       |          |         |              |         |        |        |         |         |          |      |
| KT ratio     | -0.259* | 0.726*  | 1        |         |              |         |        |        |         |         |          |      |
| AAT          | 0.076   | 0.042   | -0.032   | 1       |              |         |        |        |         |         |          |      |
| Calprotectin | -0.003  | 0.024   | 0.028    | 0.266*  | 1            |         |        |        |         |         |          |      |
| MPO          | -0.020  | -0.041  | -0.033   | 0.364*  | 0.499*       | 1       |        |        |         |         |          |      |
| NEO          | -0.158* | -0.003  | 0.103*   | -0.001  | -0.055       | 0.052   | 1      |        |         |         |          |      |
| Reg1B        | -0.035  | -0.133* | -0.109*  | 0.071   | 0.116*       | 0.185*  | 0.173* | 1      |         |         |          |      |
| AGP          | -0.182* | -0.033  | 0.073    | 0.081   | 0.116*       | 0.066   | 0.020  | -0.006 | 1       |         |          |      |
| CRP          | -0.214* | -0.013  | 0.135*   | 0.038   | 0.149*       | 0.093*  | -0.063 | 0.009  | 0.467*  | 1       |          |      |
| Ferritin     | 0.021   | -0.016  | -0.018   | -0.154* | -0.099*      | -0.132* | -0.074 | 0.07   | 0.097*  | 0.147*  | 1        |      |
| zinc         | 0.056   | -0.020  | -0.077   | 0.008   | 0.061        | 0.011   | 0.013  | 0.008  | -0.119* | -0.207* | -0.096*  | 1    |

\* Sign shows the statistical significance  $P < 0.05$
